# Supplementary material for: A heterocyclic organogallium peroxide with two dialkylgallium groups bridged by a peroxide dianion
Source: Royal Society of Chemistry journal article supplement (doi:10.1039/b906392g), 2009-01-01
Supplement: b906392g.pdf [file b906392g.pdf]

*Electronic Supplementary Information for:*

## **A Heterocyclic Organogallium Peroxide Possessing Two Alkylgallium Groups Bridged by a Peroxide Dianion**

**Werner Uhl,\* Mohammad Reza Halvagar and Marcus Layh**

*Institut für Anorganische und Analytische Chemie der Universität Münster, Corrensstraße 30, 48149 Münster, Germany. Fax: +49 251 8336660; E-mail: [uhlw@uni-muenster.de](mailto:uhlw@uni-muenster.de)*

**Single-Crystal X-ray Structure Determinations:** Crystals were mounted on a glass fibre in paraffin oil and cooled with a flow of cold nitrogen gas. Data was collected on a Bruker APEX II diffractometer at 153 K (Mo-K $\alpha$ , 0.71073). The structures were solved by direct methods using *SHELXTL*. Non-hydrogen atoms were first refined isotropically followed by anisotropic refinement by full matrix least-squares calculations based on  $F^2$  using *SHELXTL*. Hydrogen atoms except the hydroxo hydrogen atom H03 of compound **2** were positioned geometrically and allowed to ride on their respective parent atoms. The position of H03 was taken from the electron density map and its parameters (x, y, z, U) were kept fixed during refinement. Compound **2** has three disordered SiMe<sub>3</sub> groups. The methyl groups on Si31 and Si42 are both disordered over two positions that were refined to occupation factors of 0.5 and 0.42 : 0.58, respectively. The SiMe<sub>3</sub> group at Si32 is disordered as a whole over two positions, which were refined to occupations factors of 0.42 and 0.58. For these groups the following restraints were used. Thermal expansion parameters (SIMU, DELU) were refined using the default values and bond distances and angles were restricted (SAME) based on the values of SiMe<sub>3</sub> group Si21. No restraints were necessary for compound **3**.

### **References**

*SHELXTL-Plus*, REL. 4.1; Siemens Analytical X-RAY Instruments Inc.: Madison, WI, 1990; G. M. Sheldrick, *SHELXL-97*, Program for the Refinement of Structures; Universität Göttingen, 1997.

## Crystallographic data for compound 2

|                                   |                                                                                                                      |
|-----------------------------------|----------------------------------------------------------------------------------------------------------------------|
| Empirical formula                 | C <sub>34</sub> H <sub>89</sub> Ga <sub>2</sub> Li N <sub>2</sub> O <sub>3</sub> Si <sub>8</sub>                     |
| Formula weight                    | 945.17                                                                                                               |
| Temperature                       | 153(2) K                                                                                                             |
| Wavelength                        | 71.073 pm                                                                                                            |
| Crystal system                    | monoclinic                                                                                                           |
| Space group                       | Cc (TWIN; BASF 0.29)                                                                                                 |
| Unit cell dimensions              | a = 2253.7(5) pm    alpha = 90 deg<br>b = 1160.2(2) pm    beta = 116.71(3) deg<br>c = 2258.6(5) pm    gamma = 90 deg |
| Volume, Z                         | 5.2755(18) nm <sup>3</sup> , 4                                                                                       |
| Density (calculated)              | 1.190 Mg/m <sup>3</sup>                                                                                              |
| Absorption coefficient            | 1.233 mm <sup>-1</sup>                                                                                               |
| F(000)                            | 2032                                                                                                                 |
| Crystal size                      | 0.13 x 0.11 x 0.04 mm                                                                                                |
| Theta range for data collection   | 2.02 to 31.40 deg                                                                                                    |
| Limiting indices                  | -32 < h < 31,<br>-16 < k < 16,<br>-32 < l < 32                                                                       |
| Reflections collected             | 30166                                                                                                                |
| Independent reflections           | 15235 (R(int) = 0.0546)                                                                                              |
| Completeness to theta =           | 31.40 deg 92.9 %                                                                                                     |
| Max. and min. transmission        | 0.9523 and 0.8561                                                                                                    |
| Refinement method                 | Full-matrix least-squares on F <sup>2</sup>                                                                          |
| Data / restraints / parameters    | 15235 / 333 / 553                                                                                                    |
| Goodness-of-fit on F <sup>2</sup> | 1.069                                                                                                                |
| Final R indices [I > 2Sigma(I)] = | 0.0797, wR2 = 0.1786                                                                                                 |
| R indices (all data) =            | 0.1305, wR2 = 0.2039                                                                                                 |
| Absolute structure parameter      | 0.00(3)                                                                                                              |
| Largest diff. peak and hole       | 1373 and -829 e.nm <sup>-3</sup>                                                                                     |

Table 1. Atomic coordinates ( $\times 10^4$ ) and equivalent isotropic displacement parameters ( $\text{pm}^2 \times 10^{-1}$ ) for compound 2.  $U(\text{eq})$  is defined as one third of the trace of the orthogonalized  $U_{ij}$  tensor.

|        | x         | y        | z         | $U(\text{eq})$ |
|--------|-----------|----------|-----------|----------------|
| Ga(1)  | 1416(1)   | 5145(1)  | 9804(1)   | 33(1)          |
| C(1)   | 1791(3)   | 6422(6)  | 9486(3)   | 37(2)          |
| Si(11) | 1645(1)   | 7932(2)  | 9674(1)   | 61(1)          |
| C(111) | 1529(5)   | 8087(8)  | 10454(5)  | 69(3)          |
| C(112) | 2378(7)   | 8793(9)  | 9792(8)   | 120(5)         |
| C(113) | 844(6)    | 8541(10) | 9010(5)   | 89(4)          |
| Si(12) | 1659(1)   | 6212(2)  | 8616(1)   | 59(1)          |
| C(121) | 2051(6)   | 7347(11) | 8344(7)   | 101(4)         |
| C(122) | 769(6)    | 6265(14) | 7994(5)   | 109(5)         |
| C(123) | 2108(8)   | 4813(11) | 8571(7)   | 102(5)         |
| C(2)   | 1953(3)   | 4120(5)  | 10564(3)  | 31(1)          |
| Si(21) | 2361(1)   | 2858(2)  | 10395(1)  | 39(1)          |
| C(211) | 3190(4)   | 3214(8)  | 10466(5)  | 65(3)          |
| C(212) | 2459(5)   | 1628(6)  | 10975(4)  | 59(2)          |
| C(213) | 1852(4)   | 2207(7)  | 9550(3)   | 51(2)          |
| Si(22) | 2497(1)   | 4920(2)  | 11353(1)  | 32(1)          |
| C(221) | 3073(4)   | 5934(7)  | 11222(5)  | 57(2)          |
| C(222) | 3038(4)   | 3941(7)  | 12049(4)  | 49(2)          |
| C(223) | 1987(4)   | 5765(8)  | 11668(4)  | 55(2)          |
| Ga(2)  | -128(1)   | 4563(1)  | 9382(1)   | 37(1)          |
| C(3)   | -475(4)   | 3486(6)  | 9831(3)   | 45(2)          |
| Si(31) | -424(1)   | 1918(2)  | 9663(1)   | 58(1)          |
| C(311) | -440(20)  | 1710(20) | 8835(9)   | 123(16)        |
| C(312) | 382(8)    | 1290(20) | 10260(10) | 85(9)          |
| C(313) | -1096(11) | 990(20)  | 9670(20)  | 190(30)        |
| C(31A) | -785(15)  | 1630(20) | 8762(7)   | 74(9)          |
| C(31B) | 401(8)    | 1250(20) | 10042(15) | 77(9)          |
| C(31C) | -936(14)  | 1025(19) | 9980(15)  | 91(11)         |
| Si(32) | -112(4)   | 3629(6)  | 10800(4)  | 38(2)          |
| C(321) | -669(12)  | 3060(30) | 11130(11) | 91(10)         |
| C(322) | -12(12)   | 5193(12) | 11031(9)  | 67(6)          |
| C(323) | 722(7)    | 2960(18) | 11289(9)  | 63(6)          |
| Si(3A) | -382(3)   | 3905(7)  | 10645(3)  | 57(2)          |
| C(3A1) | -676(13)  | 2776(19) | 11048(13) | 124(10)        |
| C(3A2) | -808(9)   | 5233(11) | 10662(9)  | 75(5)          |
| C(3A3) | 539(6)    | 4140(20) | 11211(7)  | 110(8)         |
| C(4)   | -661(3)   | 5687(5)  | 8654(3)   | 30(1)          |
| Si(41) | -1220(1)  | 5032(2)  | 7861(1)   | 29(1)          |
| C(411) | -752(4)   | 4066(7)  | 7559(4)   | 44(2)          |
| C(412) | -1631(7)  | 6082(9)  | 7158(4)   | 106(5)         |
| C(413) | -1862(4)  | 4135(8)  | 7941(5)   | 66(3)          |
| Si(42) | -1038(1)  | 6929(3)  | 8905(1)   | 77(1)          |
| C(421) | -485(10)  | 7530(20) | 9734(9)   | 32(4)          |
| C(422) | -1874(6)  | 6706(15) | 8825(9)   | 32(4)          |
| C(423) | -1121(8)  | 8232(11) | 8323(8)   | 40(6)          |
| C(42A) | -438(10)  | 7650(20) | 9679(9)   | 64(7)          |
| C(42B) | -1692(12) | 6280(20) | 9112(16)  | 186(19)        |
| C(42C) | -1459(19) | 8050(20) | 8269(9)   | 260(30)        |
| O(1)   | 852(2)    | 4334(5)  | 8992(2)   | 49(1)          |
| O(2)   | 425(2)    | 3544(4)  | 9146(2)   | 43(1)          |
| O(3)   | 645(2)    | 5451(4)  | 9941(2)   | 39(1)          |
| N(1)   | 635(4)    | 1900(6)  | 7746(4)   | 57(2)          |
| N(2)   | 549(4)    | 537(8)   | 6799(4)   | 81(3)          |
| CN1    | 464(8)    | 2509(12) | 7111(7)   | 121(6)         |
| CN2    | 408(9)    | 1754(12) | 6570(5)   | 142(7)         |

|     |         |          |          |        |
|-----|---------|----------|----------|--------|
| CN3 | 1258(6) | 1246(13) | 7922(6)  | 109(5) |
| CN4 | 1178(7) | 497(15)  | 7336(8)  | 159(9) |
| CN5 | 125(6)  | 1035(10) | 7605(7)  | 100(4) |
| CN6 | 78(7)   | 288(12)  | 7014(7)  | 115(5) |
| Li  | 648(9)  | 2996(16) | 8513(10) | 86(6)  |

---

Table 2. Bond lengths [pm] and angles [deg] for compound 2.

---

|               |           |
|---------------|-----------|
| Ga(1)-O(3)    | 193.2(4)  |
| Ga(1)-O(1)    | 194.1(5)  |
| Ga(1)-C(2)    | 199.0(6)  |
| Ga(1)-C(1)    | 199.2(7)  |
| C(1)-Si(11)   | 186.5(7)  |
| C(1)-Si(12)   | 186.8(7)  |
| C(1)-H(1)     | 100.00    |
| Si(11)-C(112) | 184.5(12) |
| Si(11)-C(113) | 189.1(11) |
| Si(11)-C(111) | 190.4(10) |
| C(111)-H(11A) | 98.00     |
| C(111)-H(11B) | 98.00     |
| C(111)-H(11C) | 98.00     |
| C(112)-H(11D) | 98.00     |
| C(112)-H(11E) | 98.00     |
| C(112)-H(11F) | 98.00     |
| C(113)-H(11G) | 98.00     |
| C(113)-H(11H) | 98.00     |
| C(113)-H(11I) | 98.00     |
| Si(12)-C(121) | 183.7(10) |
| Si(12)-C(122) | 186.2(12) |
| Si(12)-C(123) | 193.8(13) |
| C(121)-H(12A) | 98.00     |
| C(121)-H(12B) | 98.00     |
| C(121)-H(12C) | 98.00     |
| C(122)-H(12D) | 98.00     |
| C(122)-H(12E) | 98.00     |
| C(122)-H(12F) | 98.00     |
| C(123)-H(12G) | 98.00     |
| C(123)-H(12H) | 98.00     |
| C(123)-H(12I) | 98.00     |
| C(2)-Si(21)   | 185.8(6)  |
| C(2)-Si(22)   | 189.1(6)  |
| C(2)-H(2)     | 100.00    |
| Si(21)-C(211) | 184.9(8)  |
| Si(21)-C(212) | 188.3(7)  |
| Si(21)-C(213) | 188.7(7)  |
| C(211)-H(21A) | 98.00     |
| C(211)-H(21B) | 98.00     |
| C(211)-H(21C) | 98.00     |
| C(212)-H(21D) | 98.00     |
| C(212)-H(21E) | 98.00     |
| C(212)-H(21F) | 98.00     |
| C(213)-H(21G) | 98.00     |
| C(213)-H(21H) | 98.00     |
| C(213)-H(21I) | 98.00     |
| Si(22)-C(221) | 187.0(9)  |
| Si(22)-C(222) | 187.8(8)  |
| Si(22)-C(223) | 187.8(8)  |
| C(221)-H(22A) | 98.00     |
| C(221)-H(22B) | 98.00     |
| C(221)-H(22C) | 98.00     |

|               |           |
|---------------|-----------|
| C(222)-H(22D) | 98.00     |
| C(222)-H(22E) | 98.00     |
| C(222)-H(22F) | 98.00     |
| C(223)-H(22G) | 98.00     |
| C(223)-H(22H) | 98.00     |
| C(223)-H(22I) | 98.00     |
| Ga(2)-O(3)    | 192.7(4)  |
| Ga(2)-O(2)    | 195.6(5)  |
| Ga(2)-C(3)    | 198.0(7)  |
| Ga(2)-C(4)    | 201.7(6)  |
| C(3)-Si(3A)   | 182.0(8)  |
| C(3)-Si(31)   | 187.3(6)  |
| C(3)-Si(32)   | 197.0(9)  |
| C(3)-H(3)     | 100.00    |
| Si(31)-C(31B) | 183.5(12) |
| Si(31)-C(31A) | 185.2(12) |
| Si(31)-C(312) | 185.5(12) |
| Si(31)-C(313) | 186.8(14) |
| Si(31)-C(311) | 186.8(13) |
| Si(31)-C(31C) | 191.2(12) |
| C(311)-H(31A) | 96.00     |
| C(311)-H(31B) | 96.00     |
| C(311)-H(31C) | 96.00     |
| C(312)-H(31D) | 96.00     |
| C(312)-H(31E) | 96.00     |
| C(312)-H(31F) | 96.00     |
| C(313)-H(31G) | 96.00     |
| C(313)-H(31H) | 96.00     |
| C(313)-H(31I) | 96.00     |
| C(31A)-H(31J) | 96.00     |
| C(31A)-H(31K) | 96.00     |
| C(31A)-H(31L) | 96.00     |
| C(31B)-H(31M) | 96.00     |
| C(31B)-H(31N) | 96.00     |
| C(31B)-H(31O) | 96.00     |
| C(31C)-H(31P) | 96.00     |
| C(31C)-H(31Q) | 96.00     |
| C(31C)-H(31R) | 96.00     |
| Si(32)-C(321) | 184.6(12) |
| Si(32)-C(323) | 186.8(13) |
| Si(32)-C(322) | 187.3(12) |
| C(321)-H(32A) | 96.00     |
| C(321)-H(32B) | 96.00     |
| C(321)-H(32C) | 96.00     |
| C(322)-H(32D) | 96.00     |
| C(322)-H(32E) | 96.00     |
| C(322)-H(32F) | 96.00     |
| C(323)-H(32G) | 96.00     |
| C(323)-H(32H) | 96.00     |
| C(323)-H(32I) | 96.00     |
| Si(3A)-C(3A2) | 182.5(12) |
| Si(3A)-C(3A1) | 187.8(11) |
| Si(3A)-C(3A3) | 190.5(12) |
| C(3A1)-H(3A1) | 96.00     |
| C(3A1)-H(3A2) | 96.00     |
| C(3A1)-H(3A3) | 96.00     |
| C(3A2)-H(3A4) | 96.00     |
| C(3A2)-H(3A5) | 96.00     |
| C(3A2)-H(3A6) | 96.00     |
| C(3A3)-H(3A7) | 96.00     |
| C(3A3)-H(3A8) | 96.00     |
| C(3A3)-H(3A9) | 96.00     |
| C(4)-Si(41)   | 182.9(6)  |

|               |           |
|---------------|-----------|
| C(4)-Si(42)   | 188.5(6)  |
| C(4)-H(4)     | 100.00    |
| Si(41)-C(413) | 185.7(8)  |
| Si(41)-C(411) | 186.5(7)  |
| Si(41)-C(412) | 188.2(9)  |
| C(411)-H(41A) | 98.00     |
| C(411)-H(41B) | 98.00     |
| C(411)-H(41C) | 98.00     |
| C(412)-H(41D) | 98.00     |
| C(412)-H(41E) | 98.00     |
| C(412)-H(41F) | 98.00     |
| C(413)-H(41G) | 98.00     |
| C(413)-H(41H) | 98.00     |
| C(413)-H(41I) | 98.00     |
| Si(42)-C(422) | 182.9(11) |
| Si(42)-C(42C) | 185.0(13) |
| Si(42)-C(421) | 185.7(11) |
| Si(42)-C(42A) | 185.8(11) |
| Si(42)-C(42B) | 189.2(14) |
| Si(42)-C(423) | 195.6(11) |
| C(421)-H(42A) | 96.00     |
| C(421)-H(42B) | 96.00     |
| C(421)-H(42C) | 96.00     |
| C(422)-H(42D) | 96.00     |
| C(422)-H(42E) | 96.00     |
| C(422)-H(42F) | 96.00     |
| C(423)-H(42G) | 96.00     |
| C(423)-H(42H) | 96.00     |
| C(423)-H(42I) | 96.00     |
| C(42A)-H(42J) | 96.00     |
| C(42A)-H(42K) | 96.00     |
| C(42A)-H(42L) | 96.00     |
| C(42B)-H(42M) | 96.00     |
| C(42B)-H(42N) | 96.00     |
| C(42B)-H(42O) | 96.00     |
| C(42C)-H(42P) | 96.00     |
| C(42C)-H(42Q) | 96.00     |
| C(42C)-H(42R) | 96.00     |
| O(1)-O(2)     | 148.1(7)  |
| O(1)-Li       | 182.9(15) |
| O(2)-Li       | 183.0(15) |
| O(3)-H(03)    | 81.62     |
| N(1)-CN5      | 144.8(12) |
| N(1)-CN3      | 148.5(13) |
| N(1)-CN1      | 148.6(13) |
| N(1)-Li       | 214.0(15) |
| N(2)-CN6      | 138.2(16) |
| N(2)-CN4      | 139.2(14) |
| N(2)-CN2      | 148.8(16) |
| CN1-CN2       | 146.1(17) |
| CN1-HN1A      | 99.00     |
| CN1-HN1B      | 99.00     |
| CN2-HN2A      | 99.00     |
| CN2-HN2B      | 99.00     |
| CN3-CN4       | 152.4(17) |
| CN3-HN3A      | 99.00     |
| CN3-HN3B      | 99.00     |
| CN4-HN4A      | 99.00     |
| CN4-HN4B      | 99.00     |
| CN5-CN6       | 155.6(15) |
| CN5-HN5A      | 99.00     |
| CN5-HN5B      | 99.00     |
| CN6-HN6A      | 99.00     |

CN6-HN6B

99.00

|                      |          |
|----------------------|----------|
| O(3)-Ga(1)-O(1)      | 89.2(2)  |
| O(3)-Ga(1)-C(2)      | 102.3(2) |
| O(1)-Ga(1)-C(2)      | 114.3(2) |
| O(3)-Ga(1)-C(1)      | 118.7(3) |
| O(1)-Ga(1)-C(1)      | 103.0(3) |
| C(2)-Ga(1)-C(1)      | 124.3(3) |
| Si(11)-C(1)-Si(12)   | 113.6(4) |
| Si(11)-C(1)-Ga(1)    | 118.0(4) |
| Si(12)-C(1)-Ga(1)    | 112.9(3) |
| Si(11)-C(1)-H(1)     | 103.3    |
| Si(12)-C(1)-H(1)     | 103.3    |
| Ga(1)-C(1)-H(1)      | 103.3    |
| C(112)-Si(11)-C(1)   | 107.7(5) |
| C(112)-Si(11)-C(113) | 112.7(6) |
| C(1)-Si(11)-C(113)   | 112.0(4) |
| C(112)-Si(11)-C(111) | 107.6(6) |
| C(1)-Si(11)-C(111)   | 114.3(4) |
| C(113)-Si(11)-C(111) | 102.6(5) |
| Si(11)-C(111)-H(11A) | 109.5    |
| Si(11)-C(111)-H(11B) | 109.5    |
| H(11A)-C(111)-H(11B) | 109.5    |
| Si(11)-C(111)-H(11C) | 109.5    |
| H(11A)-C(111)-H(11C) | 109.5    |
| H(11B)-C(111)-H(11C) | 109.5    |
| Si(11)-C(112)-H(11D) | 109.5    |
| Si(11)-C(112)-H(11E) | 109.5    |
| H(11D)-C(112)-H(11E) | 109.5    |
| Si(11)-C(112)-H(11F) | 109.5    |
| H(11D)-C(112)-H(11F) | 109.5    |
| H(11E)-C(112)-H(11F) | 109.5    |
| Si(11)-C(113)-H(11G) | 109.5    |
| Si(11)-C(113)-H(11H) | 109.5    |
| H(11G)-C(113)-H(11H) | 109.5    |
| Si(11)-C(113)-H(11I) | 109.5    |
| H(11G)-C(113)-H(11I) | 109.5    |
| H(11H)-C(113)-H(11I) | 109.5    |
| C(121)-Si(12)-C(122) | 103.9(6) |
| C(121)-Si(12)-C(1)   | 112.6(5) |
| C(122)-Si(12)-C(1)   | 113.4(5) |
| C(121)-Si(12)-C(123) | 104.1(5) |
| C(122)-Si(12)-C(123) | 113.5(7) |
| C(1)-Si(12)-C(123)   | 108.9(5) |
| Si(12)-C(121)-H(12A) | 109.5    |
| Si(12)-C(121)-H(12B) | 109.5    |
| H(12A)-C(121)-H(12B) | 109.5    |
| Si(12)-C(121)-H(12C) | 109.5    |
| H(12A)-C(121)-H(12C) | 109.5    |
| H(12B)-C(121)-H(12C) | 109.5    |
| Si(12)-C(122)-H(12D) | 109.5    |
| Si(12)-C(122)-H(12E) | 109.5    |
| H(12D)-C(122)-H(12E) | 109.5    |
| Si(12)-C(122)-H(12F) | 109.5    |
| H(12D)-C(122)-H(12F) | 109.5    |
| H(12E)-C(122)-H(12F) | 109.5    |
| Si(12)-C(123)-H(12G) | 109.5    |
| Si(12)-C(123)-H(12H) | 109.5    |
| H(12G)-C(123)-H(12H) | 109.5    |
| Si(12)-C(123)-H(12I) | 109.5    |
| H(12G)-C(123)-H(12I) | 109.5    |
| H(12H)-C(123)-H(12I) | 109.5    |

|                      |          |
|----------------------|----------|
| Si(21)-C(2)-Si(22)   | 114.1(3) |
| Si(21)-C(2)-Ga(1)    | 117.3(4) |
| Si(22)-C(2)-Ga(1)    | 113.9(3) |
| Si(21)-C(2)-H(2)     | 103.0    |
| Si(22)-C(2)-H(2)     | 103.0    |
| Ga(1)-C(2)-H(2)      | 103.0    |
| C(211)-Si(21)-C(2)   | 112.4(4) |
| C(211)-Si(21)-C(212) | 108.1(4) |
| C(2)-Si(21)-C(212)   | 111.6(4) |
| C(211)-Si(21)-C(213) | 108.0(4) |
| C(2)-Si(21)-C(213)   | 113.0(3) |
| C(212)-Si(21)-C(213) | 103.2(4) |
| Si(21)-C(211)-H(21A) | 109.5    |
| Si(21)-C(211)-H(21B) | 109.5    |
| H(21A)-C(211)-H(21B) | 109.5    |
| Si(21)-C(211)-H(21C) | 109.5    |
| H(21A)-C(211)-H(21C) | 109.5    |
| H(21B)-C(211)-H(21C) | 109.5    |
| Si(21)-C(212)-H(21D) | 109.5    |
| Si(21)-C(212)-H(21E) | 109.5    |
| H(21D)-C(212)-H(21E) | 109.5    |
| Si(21)-C(212)-H(21F) | 109.5    |
| H(21D)-C(212)-H(21F) | 109.5    |
| H(21E)-C(212)-H(21F) | 109.5    |
| Si(21)-C(213)-H(21G) | 109.5    |
| Si(21)-C(213)-H(21H) | 109.5    |
| H(21G)-C(213)-H(21H) | 109.5    |
| Si(21)-C(213)-H(21I) | 109.5    |
| H(21G)-C(213)-H(21I) | 109.5    |
| H(21H)-C(213)-H(21I) | 109.5    |
| C(221)-Si(22)-C(222) | 106.1(4) |
| C(221)-Si(22)-C(223) | 108.5(4) |
| C(222)-Si(22)-C(223) | 106.1(4) |
| C(221)-Si(22)-C(2)   | 111.2(4) |
| C(222)-Si(22)-C(2)   | 113.2(3) |
| C(223)-Si(22)-C(2)   | 111.4(4) |
| Si(22)-C(221)-H(22A) | 109.5    |
| Si(22)-C(221)-H(22B) | 109.5    |
| H(22A)-C(221)-H(22B) | 109.5    |
| Si(22)-C(221)-H(22C) | 109.5    |
| H(22A)-C(221)-H(22C) | 109.5    |
| H(22B)-C(221)-H(22C) | 109.5    |
| Si(22)-C(222)-H(22D) | 109.5    |
| Si(22)-C(222)-H(22E) | 109.5    |
| H(22D)-C(222)-H(22E) | 109.5    |
| Si(22)-C(222)-H(22F) | 109.5    |
| H(22D)-C(222)-H(22F) | 109.5    |
| H(22E)-C(222)-H(22F) | 109.5    |
| Si(22)-C(223)-H(22G) | 109.5    |
| Si(22)-C(223)-H(22H) | 109.5    |
| H(22G)-C(223)-H(22H) | 109.5    |
| Si(22)-C(223)-H(22I) | 109.5    |
| H(22G)-C(223)-H(22I) | 109.5    |
| H(22H)-C(223)-H(22I) | 109.5    |
| O(3)-Ga(2)-O(2)      | 90.2(2)  |
| O(3)-Ga(2)-C(3)      | 116.8(2) |
| O(2)-Ga(2)-C(3)      | 101.8(2) |
| O(3)-Ga(2)-C(4)      | 102.7(2) |
| O(2)-Ga(2)-C(4)      | 112.8(2) |
| C(3)-Ga(2)-C(4)      | 126.7(3) |
| Si(3A)-C(3)-Si(31)   | 118.3(5) |
| Si(3A)-C(3)-Si(32)   | 18.8(2)  |
| Si(31)-C(3)-Si(32)   | 105.9(4) |



|                      |           |
|----------------------|-----------|
| Si(3A)-C(3)-Ga(2)    | 117.1(4)  |
| Si(31)-C(3)-Ga(2)    | 115.8(3)  |
| Si(32)-C(3)-Ga(2)    | 117.0(4)  |
| Si(3A)-C(3)-H(3)     | 88.2      |
| Si(31)-C(3)-H(3)     | 105.7     |
| Si(32)-C(3)-H(3)     | 105.7     |
| Ga(2)-C(3)-H(3)      | 105.7     |
| C(31B)-Si(31)-C(31A) | 106.7(10) |
| C(31B)-Si(31)-C(312) | 16.1(8)   |
| C(31A)-Si(31)-C(312) | 122.0(12) |
| C(31B)-Si(31)-C(313) | 114.1(12) |
| C(31A)-Si(31)-C(313) | 87.2(15)  |
| C(312)-Si(31)-C(313) | 107.5(11) |
| C(31B)-Si(31)-C(311) | 88.5(11)  |
| C(31A)-Si(31)-C(311) | 22.3(12)  |
| C(312)-Si(31)-C(311) | 104.6(10) |
| C(313)-Si(31)-C(311) | 106.5(12) |
| C(31B)-Si(31)-C(3)   | 117.3(10) |
| C(31A)-Si(31)-C(3)   | 111.2(9)  |
| C(312)-Si(31)-C(3)   | 111.2(10) |
| C(313)-Si(31)-C(3)   | 115.8(10) |
| C(311)-Si(31)-C(3)   | 110.6(7)  |
| C(31B)-Si(31)-C(31C) | 104.6(10) |
| C(31A)-Si(31)-C(31C) | 105.8(9)  |
| C(312)-Si(31)-C(31C) | 94.4(12)  |
| C(313)-Si(31)-C(31C) | 18.9(14)  |
| C(311)-Si(31)-C(31C) | 124.0(13) |
| C(3)-Si(31)-C(31C)   | 110.4(8)  |
| Si(31)-C(311)-H(31A) | 109.5     |
| Si(31)-C(311)-H(31B) | 109.5     |
| H(31A)-C(311)-H(31B) | 109.5     |
| Si(31)-C(311)-H(31C) | 109.5     |
| H(31A)-C(311)-H(31C) | 109.5     |
| H(31B)-C(311)-H(31C) | 109.5     |
| Si(31)-C(312)-H(31D) | 109.5     |
| Si(31)-C(312)-H(31E) | 109.5     |
| H(31D)-C(312)-H(31E) | 109.5     |
| Si(31)-C(312)-H(31F) | 109.5     |
| H(31D)-C(312)-H(31F) | 109.5     |
| H(31E)-C(312)-H(31F) | 109.5     |
| Si(31)-C(313)-H(31G) | 109.5     |
| Si(31)-C(313)-H(31H) | 109.5     |
| H(31G)-C(313)-H(31H) | 109.5     |
| Si(31)-C(313)-H(31I) | 109.5     |
| H(31G)-C(313)-H(31I) | 109.5     |
| H(31H)-C(313)-H(31I) | 109.5     |
| Si(31)-C(31A)-H(31J) | 109.5     |
| Si(31)-C(31A)-H(31K) | 109.5     |
| H(31J)-C(31A)-H(31K) | 109.5     |
| Si(31)-C(31A)-H(31L) | 109.5     |
| H(31J)-C(31A)-H(31L) | 109.5     |
| H(31K)-C(31A)-H(31L) | 109.5     |
| Si(31)-C(31B)-H(31M) | 109.5     |
| Si(31)-C(31B)-H(31N) | 109.5     |
| H(31M)-C(31B)-H(31N) | 109.5     |
| Si(31)-C(31B)-H(31O) | 109.5     |
| H(31M)-C(31B)-H(31O) | 109.5     |
| H(31N)-C(31B)-H(31O) | 109.5     |
| Si(31)-C(31C)-H(31P) | 109.5     |
| Si(31)-C(31C)-H(31Q) | 109.5     |
| H(31P)-C(31C)-H(31Q) | 109.5     |
| Si(31)-C(31C)-H(31R) | 109.5     |
| H(31P)-C(31C)-H(31R) | 109.5     |

|                      |           |
|----------------------|-----------|
| H(31Q)-C(31C)-H(31R) | 109.5     |
| C(321)-Si(32)-C(323) | 107.5(11) |
| C(321)-Si(32)-C(322) | 104.6(11) |
| C(323)-Si(32)-C(322) | 106.0(10) |
| C(321)-Si(32)-C(3)   | 113.5(8)  |
| C(323)-Si(32)-C(3)   | 115.3(7)  |
| C(322)-Si(32)-C(3)   | 109.2(7)  |
| Si(32)-C(321)-H(32A) | 109.5     |
| Si(32)-C(321)-H(32B) | 109.5     |
| H(32A)-C(321)-H(32B) | 109.5     |
| Si(32)-C(321)-H(32C) | 109.5     |
| H(32A)-C(321)-H(32C) | 109.5     |
| H(32B)-C(321)-H(32C) | 109.5     |
| Si(32)-C(322)-H(32D) | 109.5     |
| Si(32)-C(322)-H(32E) | 109.5     |
| H(32D)-C(322)-H(32E) | 109.5     |
| Si(32)-C(322)-H(32F) | 109.5     |
| H(32D)-C(322)-H(32F) | 109.5     |
| H(32E)-C(322)-H(32F) | 109.5     |
| Si(32)-C(323)-H(32G) | 109.5     |
| Si(32)-C(323)-H(32H) | 109.5     |
| H(32G)-C(323)-H(32H) | 109.5     |
| Si(32)-C(323)-H(32I) | 109.5     |
| H(32G)-C(323)-H(32I) | 109.5     |
| H(32H)-C(323)-H(32I) | 109.5     |
| C(3)-Si(3A)-C(3A2)   | 115.1(7)  |
| C(3)-Si(3A)-C(3A1)   | 113.4(9)  |
| C(3A2)-Si(3A)-C(3A1) | 106.0(10) |
| C(3)-Si(3A)-C(3A3)   | 108.2(6)  |
| C(3A2)-Si(3A)-C(3A3) | 107.0(9)  |
| C(3A1)-Si(3A)-C(3A3) | 106.8(10) |
| Si(3A)-C(3A1)-H(3A1) | 109.5     |
| Si(3A)-C(3A1)-H(3A2) | 109.5     |
| H(3A1)-C(3A1)-H(3A2) | 109.5     |
| Si(3A)-C(3A1)-H(3A3) | 109.5     |
| H(3A1)-C(3A1)-H(3A3) | 109.5     |
| H(3A2)-C(3A1)-H(3A3) | 109.5     |
| Si(3A)-C(3A2)-H(3A4) | 109.5     |
| Si(3A)-C(3A2)-H(3A5) | 109.5     |
| H(3A4)-C(3A2)-H(3A5) | 109.5     |
| Si(3A)-C(3A2)-H(3A6) | 109.5     |
| H(3A4)-C(3A2)-H(3A6) | 109.5     |
| H(3A5)-C(3A2)-H(3A6) | 109.5     |
| Si(3A)-C(3A3)-H(3A7) | 109.5     |
| Si(3A)-C(3A3)-H(3A8) | 109.5     |
| H(3A7)-C(3A3)-H(3A8) | 109.5     |
| Si(3A)-C(3A3)-H(3A9) | 109.5     |
| H(3A7)-C(3A3)-H(3A9) | 109.5     |
| H(3A8)-C(3A3)-H(3A9) | 109.5     |
| Si(41)-C(4)-Si(42)   | 114.0(3)  |
| Si(41)-C(4)-Ga(2)    | 115.2(3)  |
| Si(42)-C(4)-Ga(2)    | 115.7(3)  |
| Si(41)-C(4)-H(4)     | 103.2     |
| Si(42)-C(4)-H(4)     | 103.2     |
| Ga(2)-C(4)-H(4)      | 103.2     |
| C(4)-Si(41)-C(413)   | 111.2(4)  |
| C(4)-Si(41)-C(411)   | 110.7(3)  |
| C(413)-Si(41)-C(411) | 107.0(4)  |
| C(4)-Si(41)-C(412)   | 114.7(4)  |
| C(413)-Si(41)-C(412) | 109.6(6)  |
| C(411)-Si(41)-C(412) | 103.1(5)  |
| Si(41)-C(411)-H(41A) | 109.5     |
| Si(41)-C(411)-H(41B) | 109.5     |

|                      |           |
|----------------------|-----------|
| H(41A)-C(411)-H(41B) | 109.5     |
| Si(41)-C(411)-H(41C) | 109.5     |
| H(41A)-C(411)-H(41C) | 109.5     |
| H(41B)-C(411)-H(41C) | 109.5     |
| Si(41)-C(412)-H(41D) | 109.5     |
| Si(41)-C(412)-H(41E) | 109.5     |
| H(41D)-C(412)-H(41E) | 109.5     |
| Si(41)-C(412)-H(41F) | 109.5     |
| H(41D)-C(412)-H(41F) | 109.5     |
| H(41E)-C(412)-H(41F) | 109.5     |
| Si(41)-C(413)-H(41G) | 109.5     |
| Si(41)-C(413)-H(41H) | 109.5     |
| H(41G)-C(413)-H(41H) | 109.5     |
| Si(41)-C(413)-H(41I) | 109.5     |
| H(41G)-C(413)-H(41I) | 109.5     |
| H(41H)-C(413)-H(41I) | 109.5     |
| C(422)-Si(42)-C(42C) | 82.9(14)  |
| C(422)-Si(42)-C(421) | 110.2(9)  |
| C(42C)-Si(42)-C(421) | 113.4(14) |
| C(422)-Si(42)-C(42A) | 115.9(11) |
| C(42C)-Si(42)-C(42A) | 108.6(11) |
| C(421)-Si(42)-C(42A) | 7.3(17)   |
| C(422)-Si(42)-C(4)   | 116.5(6)  |
| C(42C)-Si(42)-C(4)   | 116.5(8)  |
| C(421)-Si(42)-C(4)   | 113.7(7)  |
| C(42A)-Si(42)-C(4)   | 113.0(8)  |
| C(422)-Si(42)-C(42B) | 23.8(11)  |
| C(42C)-Si(42)-C(42B) | 106.6(11) |
| C(421)-Si(42)-C(42B) | 98.2(14)  |
| C(42A)-Si(42)-C(42B) | 105.2(9)  |
| C(4)-Si(42)-C(42B)   | 106.0(9)  |
| C(422)-Si(42)-C(423) | 105.1(7)  |
| C(42C)-Si(42)-C(423) | 22.4(13)  |
| C(421)-Si(42)-C(423) | 101.9(10) |
| C(42A)-Si(42)-C(423) | 95.6(11)  |
| C(4)-Si(42)-C(423)   | 108.0(6)  |
| C(42B)-Si(42)-C(423) | 128.6(11) |
| Si(42)-C(421)-H(42A) | 109.5     |
| Si(42)-C(421)-H(42B) | 109.5     |
| H(42A)-C(421)-H(42B) | 109.5     |
| Si(42)-C(421)-H(42C) | 109.5     |
| H(42A)-C(421)-H(42C) | 109.5     |
| H(42B)-C(421)-H(42C) | 109.5     |
| Si(42)-C(422)-H(42D) | 109.5     |
| Si(42)-C(422)-H(42E) | 109.5     |
| H(42D)-C(422)-H(42E) | 109.5     |
| Si(42)-C(422)-H(42F) | 109.5     |
| H(42D)-C(422)-H(42F) | 109.5     |
| H(42E)-C(422)-H(42F) | 109.5     |
| Si(42)-C(423)-H(42G) | 109.5     |
| Si(42)-C(423)-H(42H) | 109.5     |
| H(42G)-C(423)-H(42H) | 109.5     |
| Si(42)-C(423)-H(42I) | 109.5     |
| H(42G)-C(423)-H(42I) | 109.5     |
| H(42H)-C(423)-H(42I) | 109.5     |
| Si(42)-C(42A)-H(42J) | 109.5     |
| Si(42)-C(42A)-H(42K) | 109.5     |
| H(42J)-C(42A)-H(42K) | 109.5     |
| Si(42)-C(42A)-H(42L) | 109.5     |
| H(42J)-C(42A)-H(42L) | 109.5     |
| H(42K)-C(42A)-H(42L) | 109.5     |
| Si(42)-C(42B)-H(42M) | 109.5     |
| Si(42)-C(42B)-H(42N) | 109.5     |

|                      |           |
|----------------------|-----------|
| H(42M)-C(42B)-H(42N) | 109.5     |
| Si(42)-C(42B)-H(42O) | 109.5     |
| H(42M)-C(42B)-H(42O) | 109.5     |
| H(42N)-C(42B)-H(42O) | 109.5     |
| Si(42)-C(42C)-H(42P) | 109.5     |
| Si(42)-C(42C)-H(42Q) | 109.5     |
| H(42P)-C(42C)-H(42Q) | 109.5     |
| Si(42)-C(42C)-H(42R) | 109.5     |
| H(42P)-C(42C)-H(42R) | 109.5     |
| H(42Q)-C(42C)-H(42R) | 109.5     |
| O(2)-O(1)-Li         | 66.2(6)   |
| O(2)-O(1)-Ga(1)      | 107.3(3)  |
| Li-O(1)-Ga(1)        | 148.7(8)  |
| O(1)-O(2)-Li         | 66.1(6)   |
| O(1)-O(2)-Ga(2)      | 104.5(3)  |
| Li-O(2)-Ga(2)        | 148.7(8)  |
| Ga(2)-O(3)-Ga(1)     | 114.2(2)  |
| Ga(2)-O(3)-H(03)     | 106.9     |
| Ga(1)-O(3)-H(03)     | 113.6     |
| CN5-N(1)-CN3         | 105.4(9)  |
| CN5-N(1)-CN1         | 106.4(10) |
| CN3-N(1)-CN1         | 107.8(9)  |
| CN5-N(1)-Li          | 108.0(8)  |
| CN3-N(1)-Li          | 114.8(8)  |
| CN1-N(1)-Li          | 113.7(9)  |
| CN6-N(2)-CN4         | 109.2(13) |
| CN6-N(2)-CN2         | 104.0(11) |
| CN4-N(2)-CN2         | 108.0(13) |
| CN2-CN1-N(1)         | 114.1(10) |
| CN2-CN1-HN1A         | 108.7     |
| N(1)-CN1-HN1A        | 108.7     |
| CN2-CN1-HN1B         | 108.7     |
| N(1)-CN1-HN1B        | 108.7     |
| HN1A-CN1-HN1B        | 107.6     |
| CN1-CN2-N(2)         | 110.7(9)  |
| CN1-CN2-HN2A         | 109.5     |
| N(2)-CN2-HN2A        | 109.5     |
| CN1-CN2-HN2B         | 109.5     |
| N(2)-CN2-HN2B        | 109.5     |
| HN2A-CN2-HN2B        | 108.1     |
| N(1)-CN3-CN4         | 109.2(9)  |
| N(1)-CN3-HN3A        | 109.8     |
| CN4-CN3-HN3A         | 109.8     |
| N(1)-CN3-HN3B        | 109.8     |
| CN4-CN3-HN3B         | 109.8     |
| HN3A-CN3-HN3B        | 108.3     |
| N(2)-CN4-CN3         | 114.5(10) |
| N(2)-CN4-HN4A        | 108.6     |
| CN3-CN4-HN4A         | 108.6     |
| N(2)-CN4-HN4B        | 108.6     |
| CN3-CN4-HN4B         | 108.6     |
| HN4A-CN4-HN4B        | 107.6     |
| N(1)-CN5-CN6         | 108.4(10) |
| N(1)-CN5-HN5A        | 110.0     |
| CN6-CN5-HN5A         | 110.0     |
| N(1)-CN5-HN5B        | 110.0     |
| CN6-CN5-HN5B         | 110.0     |
| HN5A-CN5-HN5B        | 108.4     |
| N(2)-CN6-CN5         | 114.6(10) |
| N(2)-CN6-HN6A        | 108.6     |
| CN5-CN6-HN6A         | 108.6     |
| N(2)-CN6-HN6B        | 108.6     |
| CN5-CN6-HN6B         | 108.6     |

|               |           |
|---------------|-----------|
| HN6A-CN6-HN6B | 107.6     |
| O(1)-Li-O(2)  | 47.7(4)   |
| O(1)-Li-N(1)  | 153.1(11) |
| O(2)-Li-N(1)  | 158.6(10) |

Symmetry transformations used to generate equivalent atoms:

Table 3. Anisotropic displacement parameters [ $\text{pm}^2 \times 10^{-1}$ ] for compound 2. The anisotropic displacement factor exponent takes the form:  $-2 \pi^2 [ h^2 a^2 U_{11} + \dots + 2 h k a^* b^* U_{12} ]$

|        | U11     | U22     | U33     | U23     | U13     | U12     |
|--------|---------|---------|---------|---------|---------|---------|
| Ga(1)  | 21(1)   | 42(1)   | 30(1)   | 12(1)   | 8(1)    | 0(1)    |
| C(1)   | 28(3)   | 39(3)   | 30(3)   | 1(3)    | 1(3)    | -9(3)   |
| Si(11) | 65(2)   | 32(1)   | 65(2)   | 8(1)    | 11(1)   | 4(1)    |
| C(111) | 84(7)   | 48(5)   | 72(6)   | 3(4)    | 33(5)   | 15(4)   |
| C(112) | 130(11) | 49(6)   | 154(13) | -10(7)  | 40(10)  | -32(7)  |
| C(113) | 113(10) | 86(7)   | 74(8)   | 32(6)   | 47(7)   | 47(7)   |
| Si(12) | 65(2)   | 76(2)   | 47(1)   | 4(1)    | 36(1)   | -18(1)  |
| C(121) | 108(9)  | 110(9)  | 112(9)  | 60(8)   | 74(8)   | 6(7)    |
| C(122) | 92(9)   | 177(14) | 42(6)   | 17(7)   | 14(6)   | -38(9)  |
| C(123) | 151(13) | 112(10) | 88(9)   | -29(7)  | 95(9)   | -32(8)  |
| C(2)   | 28(3)   | 28(3)   | 26(3)   | -2(3)   | 2(2)    | 2(3)    |
| Si(21) | 31(1)   | 40(1)   | 34(1)   | -5(1)   | 4(1)    | 2(1)    |
| C(211) | 45(5)   | 70(6)   | 77(7)   | -23(5)  | 25(5)   | 8(4)    |
| C(212) | 76(6)   | 36(4)   | 44(5)   | 15(3)   | 7(4)    | 7(4)    |
| C(213) | 52(5)   | 49(4)   | 32(4)   | -10(3)  | 0(3)    | 6(3)    |
| Si(22) | 28(1)   | 31(1)   | 29(1)   | 0(1)    | 7(1)    | 3(1)    |
| C(221) | 55(5)   | 46(4)   | 62(5)   | -15(4)  | 20(4)   | -15(4)  |
| C(222) | 41(4)   | 56(4)   | 33(4)   | -5(3)   | 2(3)    | 3(3)    |
| C(223) | 53(5)   | 70(5)   | 44(5)   | -10(4)  | 22(4)   | 4(4)    |
| Ga(2)  | 21(1)   | 57(1)   | 31(1)   | 4(1)    | 10(1)   | 0(1)    |
| C(3)   | 45(4)   | 47(4)   | 50(5)   | -11(3)  | 27(4)   | -6(3)   |
| Si(31) | 54(1)   | 43(1)   | 53(1)   | -1(1)   | 3(1)    | 6(1)    |
| C(311) | 190(40) | 38(13)  | 47(13)  | -29(10) | -33(17) | 39(17)  |
| C(312) | 47(10)  | 190(30) | 32(11)  | 64(13)  | 33(9)   | 51(12)  |
| C(313) | 39(12)  | 39(14)  | 370(60) | 0(20)   | -20(20) | -11(10) |
| C(31A) | 100(20) | 63(13)  | 57(14)  | -28(11) | 36(15)  | -43(14) |
| C(31B) | 57(12)  | 130(19) | 53(15)  | 67(14)  | 34(11)  | 38(11)  |
| C(31C) | 90(20)  | 67(15)  | 140(20) | -52(16) | 80(20)  | -50(14) |
| Si(32) | 39(4)   | 46(3)   | 40(4)   | -7(3)   | 27(3)   | -17(3)  |
| C(321) | 62(12)  | 170(20) | 54(15)  | -55(16) | 43(12)  | -78(16) |
| C(322) | 108(18) | 67(8)   | 32(10)  | -19(8)  | 36(11)  | 0(9)    |
| C(323) | 46(8)   | 76(13)  | 60(13)  | -20(11) | 18(9)   | -15(8)  |
| Si(3A) | 40(3)   | 105(5)  | 32(3)   | -1(3)   | 22(2)   | -24(3)  |
| C(3A1) | 160(20) | 130(15) | 140(20) | 68(17)  | 116(18) | 14(15)  |
| C(3A2) | 92(12)  | 79(9)   | 69(12)  | -26(8)  | 50(10)  | -29(7)  |
| C(3A3) | 50(8)   | 230(30) | 28(8)   | -40(12) | -5(7)   | -22(10) |
| C(4)   | 18(3)   | 44(4)   | 33(3)   | -4(3)   | 17(3)   | -2(2)   |
| Si(41) | 30(1)   | 27(1)   | 28(1)   | 1(1)    | 10(1)   | 4(1)    |
| C(411) | 36(4)   | 68(5)   | 32(4)   | -7(3)   | 20(3)   | 5(3)    |
| C(412) | 199(14) | 59(6)   | 32(5)   | 12(4)   | 27(7)   | 51(7)   |
| C(413) | 45(5)   | 82(6)   | 79(6)   | -43(5)  | 35(5)   | -31(4)  |
| Si(42) | 36(1)   | 98(2)   | 60(2)   | -48(2)  | -10(1)  | 29(1)   |
| C(421) | 16(6)   | 41(8)   | 33(8)   | -11(6)  | 6(5)    | 10(5)   |
| C(422) | 16(6)   | 41(8)   | 33(8)   | -11(6)  | 6(5)    | 10(5)   |
| C(423) | 20(7)   | 12(7)   | 48(11)  | 2(6)    | -20(7)  | 3(6)    |

|        |         |         |         |          |         |         |
|--------|---------|---------|---------|----------|---------|---------|
| C(42A) | 79(15)  | 57(12)  | 64(13)  | -17(10)  | 38(11)  | -2(9)   |
| C(42B) | 42(12)  | 270(40) | 230(40) | -190(30) | 49(19)  | -21(18) |
| C(42C) | 230(40) | 270(40) | 96(18)  | -110(20) | -80(20) | 210(30) |
| O(1)   | 34(3)   | 54(3)   | 41(3)   | 1(2)     | 1(2)    | -1(2)   |
| O(2)   | 31(2)   | 60(3)   | 38(3)   | 2(2)     | 18(2)   | 3(2)    |
| O(3)   | 23(2)   | 53(3)   | 38(2)   | 3(2)     | 11(2)   | -2(2)   |
| N(1)   | 57(4)   | 48(4)   | 64(5)   | 0(3)     | 26(4)   | 7(3)    |
| N(2)   | 74(5)   | 108(7)  | 50(4)   | -18(5)   | 17(4)   | 28(5)   |
| CN1    | 180(16) | 114(10) | 82(8)   | 34(8)    | 69(10)  | 58(10)  |
| CN2    | 238(19) | 129(11) | 40(6)   | 19(7)    | 45(9)   | 109(12) |
| CN3    | 91(8)   | 133(11) | 68(7)   | -28(7)   | 5(6)    | 28(7)   |
| CN4    | 85(9)   | 205(17) | 108(11) | -68(11)  | -25(8)  | 88(10)  |
| CN5    | 85(8)   | 79(8)   | 145(11) | -48(8)   | 59(8)   | -26(6)  |
| CN6    | 107(11) | 120(10) | 121(11) | -76(9)   | 53(9)   | -15(8)  |
| Li     | 93(12)  | 86(11)  | 101(13) | -64(10)  | 62(11)  | -34(9)  |

Table 4. Hydrogen coordinates ( $\times 10^4$ ) and isotropic displacement parameters ( $\text{pm}^2 \times 10^{-1}$ ) for compound 2.

|        | x    | y    | z     | U(eq) |
|--------|------|------|-------|-------|
| H(1)   | 2282 | 6323 | 9754  | 44    |
| H(11A) | 1369 | 8865 | 10473 | 104   |
| H(11B) | 1954 | 7955 | 10845 | 104   |
| H(11C) | 1203 | 7520 | 10446 | 104   |
| H(11D) | 2373 | 8931 | 9361  | 180   |
| H(11E) | 2783 | 8374 | 10080 | 180   |
| H(11F) | 2368 | 9533 | 9997  | 180   |
| H(11G) | 902  | 8730 | 8616  | 134   |
| H(11H) | 725  | 9241 | 9176  | 134   |
| H(11I) | 489  | 7970 | 8893  | 134   |
| H(12A) | 2478 | 7561 | 8713  | 152   |
| H(12B) | 1760 | 8024 | 8202  | 152   |
| H(12C) | 2123 | 7063 | 7973  | 152   |
| H(12D) | 706  | 5816 | 7602  | 164   |
| H(12E) | 639  | 7068 | 7865  | 164   |
| H(12F) | 494  | 5941 | 8188  | 164   |
| H(12G) | 2431 | 4587 | 9019  | 152   |
| H(12H) | 2338 | 4949 | 8299  | 152   |
| H(12I) | 1781 | 4196 | 8373  | 152   |
| H(2)   | 1610 | 3756 | 10670 | 37    |
| H(21A) | 3491 | 3408 | 10928 | 97    |
| H(21B) | 3153 | 3875 | 10181 | 97    |
| H(21C) | 3366 | 2549 | 10328 | 97    |
| H(21D) | 2019 | 1347 | 10897 | 89    |
| H(21E) | 2701 | 1894 | 11435 | 89    |
| H(21F) | 2707 | 1002 | 10897 | 89    |
| H(21G) | 1816 | 2760 | 9207  | 77    |
| H(21H) | 1407 | 2020 | 9498  | 77    |
| H(21I) | 2068 | 1502 | 9506  | 77    |
| H(22A) | 3382 | 6269 | 11648 | 85    |
| H(22B) | 2815 | 6550 | 10919 | 85    |
| H(22C) | 3323 | 5513 | 11031 | 85    |
| H(22D) | 2760 | 3475 | 12188 | 73    |
| H(22E) | 3346 | 4404 | 12424 | 73    |
| H(22F) | 3290 | 3432 | 11899 | 73    |
| H(22G) | 1644 | 6199 | 11301 | 83    |
| H(22H) | 2275 | 6302 | 12012 | 83    |
| H(22I) | 1776 | 5236 | 11854 | 83    |

|        |       |      |       |     |
|--------|-------|------|-------|-----|
| H(3)   | -960  | 3662 | 9649  | 54  |
| H(31A) | -845  | 2035 | 8498  | 147 |
| H(31B) | -426  | 903  | 8753  | 147 |
| H(31C) | -67   | 2091 | 8829  | 147 |
| H(31D) | 394   | 490  | 10164 | 102 |
| H(31E) | 432   | 1380 | 10702 | 102 |
| H(31F) | 737   | 1688 | 10221 | 102 |
| H(31G) | -1521 | 1304 | 9378  | 230 |
| H(31H) | -1056 | 959  | 10115 | 230 |
| H(31I) | -1057 | 224  | 9532  | 230 |
| H(31J) | -1219 | 1966 | 8544  | 89  |
| H(31K) | -817  | 811  | 8688  | 89  |
| H(31L) | -505  | 1958 | 8588  | 89  |
| H(31M) | 362   | 447  | 9922  | 92  |
| H(31N) | 591   | 1316 | 10515 | 92  |
| H(31O) | 683   | 1628 | 9886  | 92  |
| H(31P) | -1380 | 1325 | 9799  | 109 |
| H(31Q) | -737  | 1064 | 10455 | 109 |
| H(31R) | -949  | 237  | 9844  | 109 |
| H(32A) | -749  | 2256 | 11025 | 109 |
| H(32B) | -1083 | 3471 | 10934 | 109 |
| H(32C) | -466  | 3160 | 11602 | 109 |
| H(32D) | 300   | 5538 | 10904 | 80  |
| H(32E) | 147   | 5268 | 11501 | 80  |
| H(32F) | -434  | 5575 | 10806 | 80  |
| H(32G) | 1034  | 3287 | 11154 | 76  |
| H(32H) | 693   | 2143 | 11211 | 76  |
| H(32I) | 869   | 3105 | 11752 | 76  |
| H(3A1) | -624  | 3053 | 11469 | 149 |
| H(3A2) | -418  | 2087 | 11113 | 149 |
| H(3A3) | -1136 | 2609 | 10769 | 149 |
| H(3A4) | -734  | 5386 | 11108 | 90  |
| H(3A5) | -1275 | 5151 | 10381 | 90  |
| H(3A6) | -638  | 5861 | 10507 | 90  |
| H(3A7) | 599   | 4368 | 11642 | 132 |
| H(3A8) | 707   | 4728 | 11028 | 132 |
| H(3A9) | 776   | 3432 | 11247 | 132 |
| H(4)   | -317  | 6067 | 8556  | 35  |
| H(41A) | -601  | 3382 | 7843  | 65  |
| H(41B) | -367  | 4479 | 7573  | 65  |
| H(41C) | -1042 | 3829 | 7102  | 65  |
| H(41D) | -1291 | 6539 | 7108  | 159 |
| H(41E) | -1923 | 6596 | 7253  | 159 |
| H(41F) | -1894 | 5659 | 6747  | 159 |
| H(41G) | -2014 | 4522 | 8233  | 99  |
| H(41H) | -1673 | 3383 | 8128  | 99  |
| H(41I) | -2239 | 4026 | 7502  | 99  |
| H(42A) | -48   | 7641 | 9770  | 38  |
| H(42B) | -464  | 7004 | 10071 | 38  |
| H(42C) | -659  | 8256 | 9790  | 38  |
| H(42D) | -2160 | 6436 | 8387  | 38  |
| H(42E) | -2041 | 7421 | 8903  | 38  |
| H(42F) | -1858 | 6145 | 9145  | 38  |
| H(42G) | -695  | 8399 | 8342  | 48  |
| H(42H) | -1277 | 8895 | 8464  | 48  |
| H(42I) | -1430 | 8041 | 7876  | 48  |
| H(42J) | -655  | 8270 | 9783  | 77  |
| H(42K) | -71   | 7938 | 9619  | 77  |
| H(42L) | -280  | 7098 | 10036 | 77  |
| H(42M) | -2009 | 5864 | 8735  | 223 |
| H(42N) | -1914 | 6884 | 9225  | 223 |
| H(42O) | -1484 | 5764 | 9481  | 223 |
| H(42P) | -1765 | 7687 | 7863  | 308 |

|          |       |      |      |     |
|----------|-------|------|------|-----|
| H( 42Q ) | -1134 | 8475 | 8194 | 308 |
| H( 42R ) | -1696 | 8561 | 8420 | 308 |
| HN1A     | 37    | 2918 | 6975 | 145 |
| HN1B     | 809   | 3097 | 7185 | 145 |
| HN2A     | 726   | 2006 | 6404 | 171 |
| HN2B     | -46   | 1810 | 6201 | 171 |
| HN3A     | 1356  | 754  | 8314 | 131 |
| HN3B     | 1633  | 1788 | 8035 | 131 |
| HN4A     | 1509  | 744  | 7186 | 190 |
| HN4B     | 1279  | -311 | 7489 | 190 |
| HN5A     | -307  | 1412 | 7491 | 121 |
| HN5B     | 239   | 544  | 8000 | 121 |
| HN6A     | 121   | -534 | 7146 | 139 |
| HN6B     | -369  | 393  | 6638 | 139 |
| H( 03 )  | 532   | 6127 | 9891 | 80  |

---



### Crystallographic data for compound 3

|                                   |                                                                                                                  |
|-----------------------------------|------------------------------------------------------------------------------------------------------------------|
| Empirical formula                 | C80 H200 Ga4 Li4 N8 O12 Si16                                                                                     |
| Formula weight                    | 2222.56                                                                                                          |
| Temperature                       | 153(2) K                                                                                                         |
| Wavelength                        | 154.184 pm                                                                                                       |
| Crystal system                    | tetragonal                                                                                                       |
| Space group                       | P4(2)/n                                                                                                          |
| Unit cell dimensions              | a = 2005.65(3) pm    alpha = 90 deg<br>b = 2005.65(3) pm    beta = 90 deg<br>c = 1508.69(5) pm    gamma = 90 deg |
| Volume, Z                         | 6.0689(2) nm <sup>3</sup> , 2                                                                                    |
| Density (calculated)              | 1.216 Mg/m <sup>3</sup>                                                                                          |
| Absorption coefficient            | 2.922 mm <sup>-1</sup>                                                                                           |
| F(000)                            | 2384                                                                                                             |
| Crystal size                      | 0.42 x 0.15 x 0.13 mm                                                                                            |
| Theta range for data collection   | 3.12 to 72.50 deg                                                                                                |
| Limiting indices                  | -24 < h < 21,<br>-24 < k < 24,<br>-16 < l < 18                                                                   |
| Reflections collected             | 35368                                                                                                            |
| Independent reflections           | 5941 (R(int) = 0.0630)                                                                                           |
| Completeness to theta =           | 72.50 deg 98.7 %                                                                                                 |
| Refinement method                 | Full-matrix least-squares on F <sup>2</sup>                                                                      |
| Data / restraints / parameters    | 5941 / 0 / 292                                                                                                   |
| Goodness-of-fit on F <sup>2</sup> | 1.062                                                                                                            |
| Final R indices [I>2Sigma(I)] =   | 0.0463, wR2 = 0.1261                                                                                             |
| R indices (all data) =            | 0.0518, wR2 = 0.1334                                                                                             |
| Largest diff. peak and hole       | 993 and -349 e.nm <sup>-3</sup>                                                                                  |

Table 5. Atomic coordinates ( $\times 10^4$ ) and equivalent isotropic displacement parameters ( $\text{pm}^2 \times 10^{-1}$ ) for compound 3.  $U(\text{eq})$  is defined as one third of the trace of the orthogonalized  $U_{ij}$  tensor.

|        | x       | y        | z        | U(eq) |
|--------|---------|----------|----------|-------|
| Ga(1)  | 2730(1) | 215(1)   | 9372(1)  | 23(1) |
| C(1)   | 2577(1) | -516(1)  | 8511(2)  | 29(1) |
| Si(11) | 3329(1) | -1048(1) | 8336(1)  | 36(1) |
| C(111) | 3302(2) | -1503(2) | 7242(2)  | 49(1) |
| C(112) | 4090(1) | -504(2)  | 8299(2)  | 43(1) |
| C(113) | 3418(2) | -1681(1) | 9241(2)  | 50(1) |
| Si(12) | 1750(1) | -934(1)  | 8655(1)  | 37(1) |
| C(121) | 1620(2) | -1633(1) | 7855(2)  | 55(1) |
| C(122) | 1649(2) | -1295(2) | 9780(2)  | 50(1) |
| C(123) | 1078(2) | -303(2)  | 8451(2)  | 47(1) |
| C(2)   | 2858(1) | 95(1)    | 10671(1) | 26(1) |
| Si(21) | 2214(1) | 590(1)   | 11291(1) | 29(1) |
| C(211) | 2110(2) | 284(2)   | 12452(2) | 45(1) |
| C(212) | 1371(1) | 507(2)   | 10760(2) | 38(1) |
| C(213) | 2438(2) | 1496(1)  | 11324(2) | 40(1) |
| Si(22) | 3735(1) | 203(1)   | 11071(1) | 28(1) |
| C(221) | 4147(1) | 922(1)   | 10495(2) | 41(1) |
| C(222) | 4244(1) | -562(1)  | 10884(2) | 40(1) |
| C(223) | 3806(1) | 370(1)   | 12291(2) | 38(1) |
| O(1)   | 3086(1) | 996(1)   | 8829(1)  | 29(1) |
| O(2)   | 2311(1) | 1027(1)  | 8998(1)  | 29(1) |
| O(3)   | 2574(1) | 1792(1)  | 6855(1)  | 22(1) |
| N(1)   | 2666(1) | 1214(1)  | 6359(1)  | 22(1) |
| C(3)   | 3324(1) | 903(1)   | 6596(2)  | 25(1) |
| C(4)   | 3418(1) | 270(1)   | 6017(2)  | 33(1) |
| C(5)   | 2116(1) | 728(1)   | 6556(2)  | 26(1) |
| C(6)   | 2241(1) | 87(1)    | 5999(2)  | 32(1) |
| C(7)   | 2657(1) | 1381(1)  | 5390(1)  | 27(1) |
| C(8)   | 2753(1) | 726(1)   | 4858(2)  | 32(1) |
| N(2)   | 2838(1) | 149(1)   | 5445(2)  | 31(1) |
| Li(1)  | 2597(2) | 1764(2)  | 8203(2)  | 24(1) |

Table 6. Bond lengths [pm] and angles [deg] for compound 3.

|               |            |
|---------------|------------|
| Ga(1)-O(1)    | 190.55(16) |
| Ga(1)-O(2)    | 191.71(15) |
| Ga(1)-C(1)    | 198.3(2)   |
| Ga(1)-C(2)    | 199.1(2)   |
| C(1)-Si(11)   | 186.7(2)   |
| C(1)-Si(12)   | 187.1(3)   |
| C(1)-H(1)     | 96.00      |
| Si(11)-C(113) | 187.3(3)   |
| Si(11)-C(112) | 187.6(3)   |
| Si(11)-C(111) | 188.7(3)   |
| C(111)-H(11A) | 95.99      |
| C(111)-H(11B) | 95.99      |
| C(111)-H(11C) | 95.99      |
| C(112)-H(11D) | 95.99      |
| C(112)-H(11E) | 95.99      |
| C(112)-H(11F) | 95.99      |
| C(113)-H(11G) | 95.99      |
| C(113)-H(11H) | 95.99      |

|               |          |
|---------------|----------|
| C(113)-H(11I) | 95.99    |
| Si(12)-C(122) | 185.6(3) |
| Si(12)-C(121) | 186.9(3) |
| Si(12)-C(123) | 187.3(3) |
| C(121)-H(12A) | 95.99    |
| C(121)-H(12B) | 95.99    |
| C(121)-H(12C) | 95.99    |
| C(122)-H(12D) | 95.99    |
| C(122)-H(12E) | 95.99    |
| C(122)-H(12F) | 95.99    |
| C(123)-H(12G) | 95.99    |
| C(123)-H(12H) | 95.99    |
| C(123)-H(12I) | 95.99    |
| C(2)-Si(22)   | 187.1(2) |
| C(2)-Si(21)   | 187.8(3) |
| C(2)-H(2)     | 96.00    |
| Si(21)-C(211) | 186.9(3) |
| Si(21)-C(213) | 187.3(3) |
| Si(21)-C(212) | 187.8(3) |
| C(211)-H(21A) | 95.99    |
| C(211)-H(21B) | 95.99    |
| C(211)-H(21C) | 95.99    |
| C(212)-H(21D) | 95.99    |
| C(212)-H(21E) | 95.99    |
| C(212)-H(21F) | 95.99    |
| C(213)-H(21G) | 95.99    |
| C(213)-H(21H) | 95.99    |
| C(213)-H(21I) | 95.99    |
| Si(22)-C(222) | 186.5(3) |
| Si(22)-C(221) | 187.6(3) |
| Si(22)-C(223) | 187.8(3) |
| C(221)-H(22A) | 95.99    |
| C(221)-H(22B) | 95.99    |
| C(221)-H(22C) | 95.99    |
| C(222)-H(22D) | 95.99    |
| C(222)-H(22E) | 95.99    |
| C(222)-H(22F) | 95.99    |
| C(223)-H(22G) | 95.99    |
| C(223)-H(22H) | 95.99    |
| C(223)-H(22I) | 95.99    |
| O(1)-O(2)     | 157.5(2) |
| O(1)-Li(1)    | 205.6(4) |
| O(2)-Li(1)    | 198.8(4) |
| O(3)-N(1)     | 139.4(2) |
| O(3)-Li(1)    | 203.5(4) |
| O(3)-Li(1)#1  | 203.5(4) |
| O(3)-Li(1)#2  | 209.3(4) |
| N(1)-C(7)     | 150.0(3) |
| N(1)-C(5)     | 150.2(3) |
| N(1)-C(3)     | 150.2(3) |
| C(3)-C(4)     | 155.3(3) |
| C(3)-H(3A)    | 96.00    |
| C(3)-H(3B)    | 96.00    |
| C(4)-N(2)     | 146.8(3) |
| C(4)-H(4A)    | 96.00    |
| C(4)-H(4B)    | 96.00    |
| C(5)-C(6)     | 155.7(3) |
| C(5)-H(5A)    | 96.00    |
| C(5)-H(5B)    | 96.00    |
| C(6)-N(2)     | 146.5(3) |
| C(6)-H(6A)    | 96.00    |
| C(6)-H(6B)    | 96.00    |
| C(7)-C(8)     | 155.0(3) |

|                      |            |
|----------------------|------------|
| C(7)-H(7A)           | 96.00      |
| C(7)-H(7B)           | 96.00      |
| C(8)-N(2)            | 146.7(3)   |
| C(8)-H(8A)           | 96.00      |
| C(8)-H(8B)           | 96.00      |
| Li(1)-O(3)#2         | 203.5(4)   |
| Li(1)-O(3)#1         | 209.3(4)   |
| Li(1)-Li(1)#3        | 297.8(7)   |
| Li(1)-Li(1)#1        | 298.8(6)   |
| Li(1)-Li(1)#2        | 298.8(6)   |
|                      |            |
| O(1)-Ga(1)-O(2)      | 48.67(7)   |
| O(1)-Ga(1)-C(1)      | 112.56(9)  |
| O(2)-Ga(1)-C(1)      | 111.52(9)  |
| O(1)-Ga(1)-C(2)      | 118.32(8)  |
| O(2)-Ga(1)-C(2)      | 116.69(9)  |
| C(1)-Ga(1)-C(2)      | 125.14(9)  |
| Si(11)-C(1)-Si(12)   | 118.46(12) |
| Si(11)-C(1)-Ga(1)    | 112.94(12) |
| Si(12)-C(1)-Ga(1)    | 113.12(12) |
| Si(11)-C(1)-H(1)     | 103.3      |
| Si(12)-C(1)-H(1)     | 103.3      |
| Ga(1)-C(1)-H(1)      | 103.3      |
| C(1)-Si(11)-C(113)   | 111.18(14) |
| C(1)-Si(11)-C(112)   | 109.23(12) |
| C(113)-Si(11)-C(112) | 109.75(14) |
| C(1)-Si(11)-C(111)   | 112.14(13) |
| C(113)-Si(11)-C(111) | 108.23(14) |
| C(112)-Si(11)-C(111) | 106.18(14) |
| Si(11)-C(111)-H(11A) | 109.5      |
| Si(11)-C(111)-H(11B) | 109.5      |
| H(11A)-C(111)-H(11B) | 109.5      |
| Si(11)-C(111)-H(11C) | 109.5      |
| H(11A)-C(111)-H(11C) | 109.5      |
| H(11B)-C(111)-H(11C) | 109.5      |
| Si(11)-C(112)-H(11D) | 109.5      |
| Si(11)-C(112)-H(11E) | 109.5      |
| H(11D)-C(112)-H(11E) | 109.5      |
| Si(11)-C(112)-H(11F) | 109.5      |
| H(11D)-C(112)-H(11F) | 109.5      |
| H(11E)-C(112)-H(11F) | 109.5      |
| Si(11)-C(113)-H(11G) | 109.5      |
| Si(11)-C(113)-H(11H) | 109.5      |
| H(11G)-C(113)-H(11H) | 109.5      |
| Si(11)-C(113)-H(11I) | 109.5      |
| H(11G)-C(113)-H(11I) | 109.5      |
| H(11H)-C(113)-H(11I) | 109.5      |
| C(122)-Si(12)-C(121) | 106.39(15) |
| C(122)-Si(12)-C(1)   | 112.22(13) |
| C(121)-Si(12)-C(1)   | 112.63(14) |
| C(122)-Si(12)-C(123) | 109.63(16) |
| C(121)-Si(12)-C(123) | 107.43(14) |
| C(1)-Si(12)-C(123)   | 108.42(12) |
| Si(12)-C(121)-H(12A) | 109.5      |
| Si(12)-C(121)-H(12B) | 109.5      |
| H(12A)-C(121)-H(12B) | 109.5      |
| Si(12)-C(121)-H(12C) | 109.5      |
| H(12A)-C(121)-H(12C) | 109.5      |
| H(12B)-C(121)-H(12C) | 109.5      |
| Si(12)-C(122)-H(12D) | 109.5      |
| Si(12)-C(122)-H(12E) | 109.5      |
| H(12D)-C(122)-H(12E) | 109.5      |

|                      |            |
|----------------------|------------|
| Si(12)-C(122)-H(12F) | 109.5      |
| H(12D)-C(122)-H(12F) | 109.5      |
| H(12E)-C(122)-H(12F) | 109.5      |
| Si(12)-C(123)-H(12G) | 109.5      |
| Si(12)-C(123)-H(12H) | 109.5      |
| H(12G)-C(123)-H(12H) | 109.5      |
| Si(12)-C(123)-H(12I) | 109.5      |
| H(12G)-C(123)-H(12I) | 109.5      |
| H(12H)-C(123)-H(12I) | 109.5      |
| Si(22)-C(2)-Si(21)   | 115.15(12) |
| Si(22)-C(2)-Ga(1)    | 115.11(11) |
| Si(21)-C(2)-Ga(1)    | 109.72(12) |
| Si(22)-C(2)-H(2)     | 105.3      |
| Si(21)-C(2)-H(2)     | 105.3      |
| Ga(1)-C(2)-H(2)      | 105.3      |
| C(211)-Si(21)-C(213) | 108.72(14) |
| C(211)-Si(21)-C(2)   | 111.73(12) |
| C(213)-Si(21)-C(2)   | 111.12(12) |
| C(211)-Si(21)-C(212) | 105.70(13) |
| C(213)-Si(21)-C(212) | 108.28(13) |
| C(2)-Si(21)-C(212)   | 111.09(11) |
| Si(21)-C(211)-H(21A) | 109.5      |
| Si(21)-C(211)-H(21B) | 109.5      |
| H(21A)-C(211)-H(21B) | 109.5      |
| Si(21)-C(211)-H(21C) | 109.5      |
| H(21A)-C(211)-H(21C) | 109.5      |
| H(21B)-C(211)-H(21C) | 109.5      |
| Si(21)-C(212)-H(21D) | 109.5      |
| Si(21)-C(212)-H(21E) | 109.5      |
| H(21D)-C(212)-H(21E) | 109.5      |
| Si(21)-C(212)-H(21F) | 109.5      |
| H(21D)-C(212)-H(21F) | 109.5      |
| H(21E)-C(212)-H(21F) | 109.5      |
| Si(21)-C(213)-H(21G) | 109.5      |
| Si(21)-C(213)-H(21H) | 109.5      |
| H(21G)-C(213)-H(21H) | 109.5      |
| Si(21)-C(213)-H(21I) | 109.5      |
| H(21G)-C(213)-H(21I) | 109.5      |
| H(21H)-C(213)-H(21I) | 109.5      |
| C(222)-Si(22)-C(2)   | 111.79(12) |
| C(222)-Si(22)-C(221) | 108.75(14) |
| C(2)-Si(22)-C(221)   | 110.70(11) |
| C(222)-Si(22)-C(223) | 104.69(12) |
| C(2)-Si(22)-C(223)   | 114.10(11) |
| C(221)-Si(22)-C(223) | 106.45(13) |
| Si(22)-C(221)-H(22A) | 109.5      |
| Si(22)-C(221)-H(22B) | 109.5      |
| H(22A)-C(221)-H(22B) | 109.5      |
| Si(22)-C(221)-H(22C) | 109.5      |
| H(22A)-C(221)-H(22C) | 109.5      |
| H(22B)-C(221)-H(22C) | 109.5      |
| Si(22)-C(222)-H(22D) | 109.5      |
| Si(22)-C(222)-H(22E) | 109.5      |
| H(22D)-C(222)-H(22E) | 109.5      |
| Si(22)-C(222)-H(22F) | 109.5      |
| H(22D)-C(222)-H(22F) | 109.5      |
| H(22E)-C(222)-H(22F) | 109.5      |
| Si(22)-C(223)-H(22G) | 109.5      |
| Si(22)-C(223)-H(22H) | 109.5      |
| H(22G)-C(223)-H(22H) | 109.5      |
| Si(22)-C(223)-H(22I) | 109.5      |
| H(22G)-C(223)-H(22I) | 109.5      |
| H(22H)-C(223)-H(22I) | 109.5      |

|                      |            |
|----------------------|------------|
| O(2)-O(1)-Ga(1)      | 66.05(8)   |
| O(2)-O(1)-Li(1)      | 64.83(13)  |
| Ga(1)-O(1)-Li(1)     | 129.43(13) |
| O(1)-O(2)-Ga(1)      | 65.28(8)   |
| O(1)-O(2)-Li(1)      | 69.36(13)  |
| Ga(1)-O(2)-Li(1)     | 133.06(13) |
| N(1)-O(3)-Li(1)      | 120.69(15) |
| N(1)-O(3)-Li(1)#1    | 125.77(15) |
| Li(1)-O(3)-Li(1)#1   | 94.49(15)  |
| N(1)-O(3)-Li(1)#2    | 122.37(15) |
| Li(1)-O(3)-Li(1)#2   | 92.76(15)  |
| Li(1)#1-O(3)-Li(1)#2 | 92.33(15)  |
| O(3)-N(1)-C(7)       | 109.62(16) |
| O(3)-N(1)-C(5)       | 109.61(16) |
| C(7)-N(1)-C(5)       | 109.14(17) |
| O(3)-N(1)-C(3)       | 109.59(15) |
| C(7)-N(1)-C(3)       | 109.63(17) |
| C(5)-N(1)-C(3)       | 109.23(17) |
| N(1)-C(3)-C(4)       | 108.19(17) |
| N(1)-C(3)-H(3A)      | 110.1      |
| C(4)-C(3)-H(3A)      | 110.1      |
| N(1)-C(3)-H(3B)      | 110.1      |
| C(4)-C(3)-H(3B)      | 110.1      |
| H(3A)-C(3)-H(3B)     | 108.4      |
| N(2)-C(4)-C(3)       | 111.65(19) |
| N(2)-C(4)-H(4A)      | 109.3      |
| C(3)-C(4)-H(4A)      | 109.3      |
| N(2)-C(4)-H(4B)      | 109.3      |
| C(3)-C(4)-H(4B)      | 109.3      |
| H(4A)-C(4)-H(4B)     | 108.0      |
| N(1)-C(5)-C(6)       | 108.08(18) |
| N(1)-C(5)-H(5A)      | 110.1      |
| C(6)-C(5)-H(5A)      | 110.1      |
| N(1)-C(5)-H(5B)      | 110.1      |
| C(6)-C(5)-H(5B)      | 110.1      |
| H(5A)-C(5)-H(5B)     | 108.4      |
| N(2)-C(6)-C(5)       | 111.66(18) |
| N(2)-C(6)-H(6A)      | 109.3      |
| C(5)-C(6)-H(6A)      | 109.3      |
| N(2)-C(6)-H(6B)      | 109.3      |
| C(5)-C(6)-H(6B)      | 109.3      |
| H(6A)-C(6)-H(6B)     | 107.9      |
| N(1)-C(7)-C(8)       | 108.26(18) |
| N(1)-C(7)-H(7A)      | 110.0      |
| C(8)-C(7)-H(7A)      | 110.0      |
| N(1)-C(7)-H(7B)      | 110.0      |
| C(8)-C(7)-H(7B)      | 110.0      |
| H(7A)-C(7)-H(7B)     | 108.4      |
| N(2)-C(8)-C(7)       | 111.76(19) |
| N(2)-C(8)-H(8A)      | 109.3      |
| C(7)-C(8)-H(8A)      | 109.3      |
| N(2)-C(8)-H(8B)      | 109.3      |
| C(7)-C(8)-H(8B)      | 109.3      |
| H(8A)-C(8)-H(8B)     | 107.9      |
| C(6)-N(2)-C(8)       | 108.5(2)   |
| C(6)-N(2)-C(4)       | 109.0(2)   |
| C(8)-N(2)-C(4)       | 108.45(19) |
| O(2)-Li(1)-O(3)      | 128.08(19) |
| O(2)-Li(1)-O(3)#2    | 142.4(2)   |
| O(3)-Li(1)-O(3)#2    | 87.08(15)  |
| O(2)-Li(1)-O(1)      | 45.81(10)  |
| O(3)-Li(1)-O(1)      | 119.42(19) |
| O(3)#2-Li(1)-O(1)    | 109.34(17) |

|                       |            |
|-----------------------|------------|
| O(2)-Li(1)-O(3)#1     | 105.93(18) |
| O(3)-Li(1)-O(3)#1     | 85.56(15)  |
| O(3)#2-Li(1)-O(3)#1   | 87.47(15)  |
| O(1)-Li(1)-O(3)#1     | 149.6(2)   |
| O(2)-Li(1)-Li(1)#3    | 134.37(16) |
| O(3)-Li(1)-Li(1)#3    | 88.24(11)  |
| O(3)#2-Li(1)-Li(1)#3  | 44.61(10)  |
| O(1)-Li(1)-Li(1)#3    | 143.67(17) |
| O(3)#1-Li(1)-Li(1)#3  | 43.07(10)  |
| O(2)-Li(1)-Li(1)#1    | 125.82(19) |
| O(3)-Li(1)-Li(1)#1    | 42.76(12)  |
| O(3)#2-Li(1)-Li(1)#1  | 87.94(11)  |
| O(1)-Li(1)-Li(1)#1    | 156.0(2)   |
| O(3)#1-Li(1)-Li(1)#1  | 42.85(7)   |
| Li(1)#3-Li(1)-Li(1)#1 | 60.12(7)   |
| O(2)-Li(1)-Li(1)#2    | 165.4(2)   |
| O(3)-Li(1)-Li(1)#2    | 44.38(13)  |
| O(3)#2-Li(1)-Li(1)#2  | 42.75(8)   |
| O(1)-Li(1)-Li(1)#2    | 122.76(19) |
| O(3)#1-Li(1)-Li(1)#2  | 86.91(10)  |
| Li(1)#3-Li(1)-Li(1)#2 | 60.12(7)   |
| Li(1)#1-Li(1)-Li(1)#2 | 59.76(14)  |

Symmetry transformations used to generate equivalent atoms:

#1  $y, -x+1/2, -z+3/2$  #2  $-y+1/2, x, -z+3/2$   
 #3  $-x+1/2, -y+1/2, z$

Table 7. Anisotropic displacement parameters [ $\text{pm}^2 \times 10^{-1}$ ] for compound 3. The anisotropic displacement factor exponent takes the form:  $-2 \pi^2 [ h^2 a^2 U_{11} + \dots + 2 h k a^* b^* U_{12} ]$

|        | U11   | U22   | U33   | U23    | U13    | U12    |
|--------|-------|-------|-------|--------|--------|--------|
| Ga(1)  | 27(1) | 19(1) | 23(1) | 1(1)   | -1(1)  | 1(1)   |
| C(1)   | 39(1) | 21(1) | 26(1) | -1(1)  | -5(1)  | 1(1)   |
| Si(11) | 48(1) | 27(1) | 32(1) | -4(1)  | -3(1)  | 9(1)   |
| C(111) | 68(2) | 37(1) | 41(2) | -11(1) | 2(1)   | 11(1)  |
| C(112) | 41(2) | 47(2) | 42(2) | -1(1)  | 0(1)   | 10(1)  |
| C(113) | 73(2) | 31(1) | 47(2) | 4(1)   | -11(1) | 10(1)  |
| Si(12) | 44(1) | 25(1) | 41(1) | -3(1)  | -7(1)  | -6(1)  |
| C(121) | 69(2) | 31(1) | 67(2) | -13(1) | -21(2) | -7(1)  |
| C(122) | 60(2) | 39(2) | 52(2) | 6(1)   | 2(1)   | -14(1) |
| C(123) | 41(2) | 39(2) | 62(2) | -8(1)  | -12(1) | -4(1)  |
| C(2)   | 32(1) | 23(1) | 22(1) | 4(1)   | -1(1)  | 0(1)   |
| Si(21) | 33(1) | 30(1) | 25(1) | 1(1)   | 2(1)   | 2(1)   |
| C(211) | 49(2) | 56(2) | 30(1) | 9(1)   | 8(1)   | 4(1)   |
| C(212) | 31(1) | 45(2) | 39(1) | -3(1)  | 3(1)   | 4(1)   |
| C(213) | 47(2) | 32(1) | 41(2) | -5(1)  | -5(1)  | 5(1)   |
| Si(22) | 31(1) | 28(1) | 27(1) | 3(1)   | -4(1)  | 0(1)   |
| C(221) | 34(1) | 42(2) | 47(2) | 12(1)  | -8(1)  | -8(1)  |
| C(222) | 39(1) | 43(2) | 38(1) | 1(1)   | -5(1)  | 11(1)  |
| C(223) | 41(1) | 41(1) | 32(1) | -1(1)  | -10(1) | 2(1)   |
| O(1)   | 25(1) | 25(1) | 36(1) | 6(1)   | 1(1)   | -2(1)  |
| O(2)   | 28(1) | 25(1) | 34(1) | 6(1)   | 4(1)   | 6(1)   |
| O(3)   | 23(1) | 18(1) | 23(1) | -4(1)  | -1(1)  | 1(1)   |
| N(1)   | 22(1) | 20(1) | 23(1) | -2(1)  | -1(1)  | 0(1)   |
| C(3)   | 24(1) | 25(1) | 27(1) | -2(1)  | -3(1)  | 2(1)   |
| C(4)   | 33(1) | 28(1) | 39(1) | -7(1)  | -4(1)  | 6(1)   |
| C(5)   | 24(1) | 22(1) | 31(1) | 1(1)   | 1(1)   | -5(1)  |

|       |       |       |       |       |       |       |
|-------|-------|-------|-------|-------|-------|-------|
| C(6)  | 36(1) | 23(1) | 35(1) | -3(1) | 0(1)  | -6(1) |
| C(7)  | 33(1) | 28(1) | 22(1) | 1(1)  | -1(1) | -1(1) |
| C(8)  | 34(1) | 36(1) | 25(1) | -7(1) | 1(1)  | 0(1)  |
| N(2)  | 33(1) | 26(1) | 34(1) | -8(1) | -2(1) | 1(1)  |
| Li(1) | 25(2) | 20(2) | 27(2) | 1(1)  | -2(1) | -1(1) |

Table 8. Hydrogen coordinates ( $\times 10^4$ ) and isotropic displacement parameters ( $\text{pm}^2 \times 10^{-1}$ ) for compound 3.

|        | x    | y     | z     | U(eq) |
|--------|------|-------|-------|-------|
| H(1)   | 2530 | -285  | 7956  | 34    |
| H(11A) | 2936 | -1812 | 7242  | 58    |
| H(11B) | 3712 | -1741 | 7156  | 58    |
| H(11C) | 3243 | -1187 | 6770  | 58    |
| H(11D) | 4060 | -206  | 7803  | 52    |
| H(11E) | 4480 | -778  | 8239  | 52    |
| H(11F) | 4119 | -251  | 8838  | 52    |
| H(11G) | 3362 | -1467 | 9806  | 60    |
| H(11H) | 3852 | -1880 | 9211  | 60    |
| H(11I) | 3084 | -2020 | 9171  | 60    |
| H(12A) | 1916 | -1993 | 7998  | 66    |
| H(12B) | 1709 | -1479 | 7264  | 66    |
| H(12C) | 1167 | -1785 | 7892  | 66    |
| H(12D) | 1997 | -1614 | 9885  | 60    |
| H(12E) | 1223 | -1512 | 9821  | 60    |
| H(12F) | 1674 | -946  | 10214 | 60    |
| H(12G) | 652  | -494  | 8594  | 57    |
| H(12H) | 1083 | -174  | 7838  | 57    |
| H(12I) | 1154 | 82    | 8815  | 57    |
| H(2)   | 2751 | -363  | 10785 | 31    |
| H(21A) | 2515 | 357   | 12777 | 54    |
| H(21B) | 2010 | -184  | 12445 | 54    |
| H(21C) | 1752 | 521   | 12732 | 54    |
| H(21D) | 1047 | 744   | 11106 | 46    |
| H(21E) | 1250 | 44    | 10730 | 46    |
| H(21F) | 1386 | 689   | 10172 | 46    |
| H(21G) | 2833 | 1556  | 11674 | 48    |
| H(21H) | 2078 | 1744  | 11581 | 48    |
| H(21I) | 2519 | 1653  | 10732 | 48    |
| H(22A) | 4180 | 829   | 9872  | 49    |
| H(22B) | 4585 | 988   | 10735 | 49    |
| H(22C) | 3886 | 1318  | 10582 | 49    |
| H(22D) | 4046 | -931  | 11193 | 48    |
| H(22E) | 4688 | -491  | 11101 | 48    |
| H(22F) | 4260 | -659  | 10261 | 48    |
| H(22G) | 3588 | 783   | 12430 | 46    |
| H(22H) | 4268 | 399   | 12453 | 46    |
| H(22I) | 3599 | 14    | 12615 | 46    |
| H(3A)  | 3330 | 785   | 7212  | 30    |
| H(3B)  | 3680 | 1213  | 6487  | 30    |
| H(4A)  | 3808 | 321   | 5655  | 40    |
| H(4B)  | 3485 | -110  | 6395  | 40    |
| H(5A)  | 1692 | 919   | 6402  | 31    |
| H(5B)  | 2112 | 622   | 7176  | 31    |
| H(6A)  | 2293 | -287  | 6390  | 38    |
| H(6B)  | 1861 | 3     | 5627  | 38    |
| H(7A)  | 3008 | 1689  | 5254  | 33    |
| H(7B)  | 2239 | 1584  | 5235  | 33    |



|          |      |     |      |    |
|----------|------|-----|------|----|
| H ( 8A ) | 2372 | 655 | 4485 | 38 |
| H ( 8B ) | 3138 | 768 | 4484 | 38 |

---
